# Supplementary material for: Outcomes from a large 10 year hepatitis C treatment programme in people who inject drugs: No effect of recent or former injecting drug use on treatment adherence or therapeutic response
Source: PLoS One. 2017 Jun 21;12(6):e0178398. doi: 10.1371/journal.pone.0178398 (PMC5479520; doi:10.1371/journal.pone.0178398)
Supplement: S1 File — (XLSX) [file pone.0178398.s001.xlsx]

## Sheet: Sheet1
ID	Viral Load	Sex	Genotype	Infection Source	Outcome	SVR/non-SVR	Cirrhosis	HCV mono-infection/HIV co-infection
1	3283595	Male	2	PWID	SVR	SVR	Non-Cirrhotic	Mono-infected
2	259649	Male	3	PWID	LTF	non-SVR	Non-Cirrhotic	Mono-infected
3	27764	Female	3	PWID	SVR	SVR	Non-Cirrhotic	Mono-infected
4	1826923	Male	1	PWID	SVR	SVR	Non-Cirrhotic	Mono-infected
5	884615	Male	1	PWID	SVR	SVR	Non-Cirrhotic	Mono-infected
6	1076923	Male	1	PWID	Relapser	non-SVR	Non-Cirrhotic	Mono-infected
7	1723378	Male	3	PWID	SVR	SVR	Non-Cirrhotic	Mono-infected
8	3173076	Male	3	PWID	SVR	SVR	Non-Cirrhotic	Mono-infected
9	354147	Male	3	PWID	SVR	SVR	Non-Cirrhotic	Mono-infected
10	1173076	Male	1	PWID	SVR	SVR	Non-Cirrhotic	Mono-infected
11	856384	Male	1	PWID	Relapser	non-SVR	Non-Cirrhotic	Mono-infected
12	653846	Male	3	PWID	Supsended	non-SVR	Cirrhotic	Mono-infected
13	4153	Female	3	PWID	SVR	SVR	Non-Cirrhotic	Mono-infected
14	1634615	Male	1	PWID	SVR	SVR	Non-Cirrhotic	Mono-infected
15	79645	Female	4	PWID	Non-Responder	non-SVR	Non-Cirrhotic	Mono-infected
16	1192307	Male	3	PWID	SVR	SVR	Cirrhotic	Mono-infected
17	807692	Male	1	PWID	Non-Responder	non-SVR	Cirrhotic	Mono-infected
18	1923076	Female	1	PWID	SVR	SVR	Cirrhotic	Mono-infected
19	100705	Female	3	PWID	SVR	SVR	Non-Cirrhotic	Mono-infected
20	961538	Male	4	non-PWID	SVR	SVR	Cirrhotic	Mono-infected
21	1185709	Male	3	PWID	SVR	SVR	Non-Cirrhotic	Mono-infected
22	2782749	Male	3	PWID	SVR	SVR	Non-Cirrhotic	Mono-infected
23	4300000	Female	1	PWID	SVR	SVR	Non-Cirrhotic	Mono-infected
24	615	Male	1	PWID	SVR	SVR	Non-Cirrhotic	Mono-infected
25	5961538	Male	1	PWID	Relapser	non-SVR	Non-Cirrhotic	Mono-infected
26	2692307	Male	1	non-PWID	Relapser	non-SVR	Non-Cirrhotic	Mono-infected
27	3826923	Male	1	PWID	Relapser	non-SVR	Non-Cirrhotic	Mono-infected
28	877245	Male	3	PWID	Relapser	non-SVR	Non-Cirrhotic	Mono-infected
29	846153	Male	3	PWID	SVR	SVR	Non-Cirrhotic	Mono-infected
30	2923076	Male	3	PWID	SVR	SVR	Cirrhotic	Mono-infected
31	2346153	Male	4	PWID	Non-Responder	non-SVR	Non-Cirrhotic	Mono-infected
32	1211538	Female	1	PWID	Non-Responder	non-SVR	Non-Cirrhotic	Mono-infected
33	186453	Female	3	PWID	SVR	SVR	Non-Cirrhotic	Mono-infected
34	75944	Male	3	PWID	Supsended	non-SVR	Non-Cirrhotic	Mono-infected
35	414403	Female	3	PWID	SVR	SVR	Cirrhotic	Mono-infected
36	3269230	Male	1	PWID	Non-Responder	non-SVR	Non-Cirrhotic	Mono-infected
37	435927	Male	3	PWID	SVR	SVR	Non-Cirrhotic	Mono-infected
38	2442307	Male	1	non-PWID	SVR	SVR	Non-Cirrhotic	Mono-infected
39	949263	Male	3	PWID	SVR	SVR	Non-Cirrhotic	Mono-infected
40	673076	Male	3	non-PWID	Relapser	non-SVR	Non-Cirrhotic	Mono-infected
41	211538	Female	3	PWID	SVR	SVR	Non-Cirrhotic	Mono-infected
42	7134615	Male	3	PWID	Supsended	non-SVR	Non-Cirrhotic	Mono-infected
43	769230	Male	1	PWID	Non-Responder	non-SVR	Non-Cirrhotic	Mono-infected
44	5126	Female	1	PWID	Supsended	non-SVR	Non-Cirrhotic	Mono-infected
45	1600000	Male	1	PWID	Relapser	non-SVR	Non-Cirrhotic	Mono-infected
46	4480769	Male	1	PWID	SVR	SVR	Non-Cirrhotic	Mono-infected
47	673	Female	3	PWID	SVR	SVR	Non-Cirrhotic	Mono-infected
48	98442	Male	3	PWID	SVR	SVR	Non-Cirrhotic	Mono-infected
49		Male	2	PWID	SVR	SVR	Non-Cirrhotic	Mono-infected
50	83496	Male	1	PWID	SVR	SVR	Non-Cirrhotic	Mono-infected
51		Male	3	PWID	SVR	SVR	Non-Cirrhotic	Mono-infected
52	7157915	Male	3	PWID	SVR	SVR	Non-Cirrhotic	Mono-infected
53	615	Male	1	PWID	SVR	SVR	Non-Cirrhotic	Mono-infected
54	73808	Male	1	PWID	Relapser	non-SVR	Non-Cirrhotic	Mono-infected
55	76437	Male	1	PWID	Relapser	non-SVR	Non-Cirrhotic	Mono-infected
56	589992	Male	3	PWID	SVR	SVR	Non-Cirrhotic	Mono-infected
57		Male	2	PWID	SVR	SVR	Non-Cirrhotic	Mono-infected
58	2908342	Male	3	PWID	SVR	SVR	Non-Cirrhotic	Mono-infected
59	409888	Male	3	PWID	SVR	SVR	Non-Cirrhotic	Mono-infected
60	218352	Male	3	PWID	SVR	SVR	Non-Cirrhotic	Mono-infected
61	5864268	Male	1	PWID	Non-Responder	non-SVR	Non-Cirrhotic	Mono-infected
62		Male	3	PWID	SVR	SVR	Non-Cirrhotic	Mono-infected
63	35158	Male	3	PWID	SVR	SVR	Non-Cirrhotic	Mono-infected
64	206990	Male	3	PWID	Relapser	non-SVR	Non-Cirrhotic	Mono-infected
65	2307988	Male	1	PWID	Relapser	non-SVR	Non-Cirrhotic	Mono-infected
66		Male	1	PWID	SVR	SVR	Non-Cirrhotic	Mono-infected
67		Female	3	PWID	SVR	SVR	Non-Cirrhotic	Mono-infected
68		Female	3	PWID	SVR	SVR	Non-Cirrhotic	Mono-infected
69		Male	2	PWID	SVR	SVR	Non-Cirrhotic	Mono-infected
70	1573076	Male	1	PWID	Relapser	non-SVR	Non-Cirrhotic	Mono-infected
71	1985737	Male	3	PWID	Relapser	non-SVR	Cirrhotic	Mono-infected
72	1754795	Female	1	PWID	Non-Responder	non-SVR	Non-Cirrhotic	Mono-infected
73	1411738	Male	3	PWID	Supsended	non-SVR	Non-Cirrhotic	Mono-infected
74	12853	Male	3	PWID	SVR	SVR	Non-Cirrhotic	Mono-infected
75		Male	3	PWID	SVR	SVR	Cirrhotic	Mono-infected
76	51930	Female	3	PWID	SVR	SVR	Non-Cirrhotic	Mono-infected
77	512754	Male	3	PWID	SVR	SVR	Cirrhotic	Mono-infected
78	2915423	Male	1	PWID	SVR	SVR	Non-Cirrhotic	Mono-infected
79	433040	Male	1	PWID	Relapser	non-SVR	Non-Cirrhotic	Mono-infected
80		Male	1	PWID	SVR	SVR	Non-Cirrhotic	Mono-infected
81	138347	Male	3	PWID	SVR	SVR	Non-Cirrhotic	Mono-infected
82	1317297	Male	2	PWID	SVR	SVR	Non-Cirrhotic	Mono-infected
83		Male	1	PWID	SVR	SVR	Non-Cirrhotic	Mono-infected
84	6999	Male	1	PWID	LTF	non-SVR	Non-Cirrhotic	Mono-infected
85	4307835	Male	1	PWID	Relapser	non-SVR	Cirrhotic	Mono-infected
86	3975	Male	3	PWID	SVR	SVR	Cirrhotic	Mono-infected
87	406816	Male	1	PWID	SVR	SVR	Non-Cirrhotic	Mono-infected
88	18010550	Male	1	non-PWID	Relapser	non-SVR	Non-Cirrhotic	Mono-infected
89	4139599	Male	1	PWID	SVR	SVR	Non-Cirrhotic	Mono-infected
90	5973760	Male	1	PWID	SVR	SVR	Non-Cirrhotic	Mono-infected
91	3009219	Female	1	PWID	SVR	SVR	Non-Cirrhotic	Mono-infected
92	110257	Female	1	PWID	SVR	SVR	Non-Cirrhotic	Mono-infected
93	1056653	Male	1	PWID	SVR	SVR	Non-Cirrhotic	Mono-infected
94	681027	Male	3	PWID	SVR	SVR	Cirrhotic	Mono-infected
95	4205660	Male	1	PWID	LTF	non-SVR	Non-Cirrhotic	Mono-infected
96	3320363	Male	3	PWID	SVR	SVR	Non-Cirrhotic	Mono-infected
97	639728	Female	3	PWID	SVR	SVR	Non-Cirrhotic	Mono-infected
98	9710	Female	1	PWID	LTF	non-SVR	Non-Cirrhotic	Mono-infected
99		Male	3	PWID	SVR	SVR	Cirrhotic	Mono-infected
100	26587	Male	1	PWID	LTF	non-SVR	Cirrhotic	Mono-infected
101	84557	Female	3	PWID	SVR	SVR	Non-Cirrhotic	Mono-infected
102	920500	Female	3	PWID	SVR	SVR	Non-Cirrhotic	Mono-infected
103	51164	Male	3	PWID	SVR	SVR	Non-Cirrhotic	Mono-infected
104	276904	Male	3	PWID	SVR	SVR	Cirrhotic	Mono-infected
105	430639	Male	2	PWID	Relapser	non-SVR	Non-Cirrhotic	Mono-infected
106	412007	Male	3	PWID	SVR	SVR	Non-Cirrhotic	Mono-infected
107	741623	Male	3	PWID	SVR	SVR	Non-Cirrhotic	Mono-infected
108	441139	Male	3	PWID	SVR	SVR	Non-Cirrhotic	Mono-infected
109	16962	Male	3	PWID	SVR	SVR	Non-Cirrhotic	Mono-infected
110	20740	Male	3	PWID	SVR	SVR	Non-Cirrhotic	Mono-infected
111	1551758	Male	1	PWID	Non-Responder	non-SVR	Non-Cirrhotic	Mono-infected
112	24992	Male	3	PWID	SVR	SVR	Non-Cirrhotic	Mono-infected
113	3648985	Female	3	PWID	SVR	SVR	Cirrhotic	Mono-infected
114	1738360	Male	3	PWID	SVR	SVR	Non-Cirrhotic	Mono-infected
115	26864	Female	2	PWID	SVR	SVR	Non-Cirrhotic	Mono-infected
116	301581	Male	3	PWID	Supsended	non-SVR	Cirrhotic	Mono-infected
117	588513	Male	1	PWID	Supsended	non-SVR	Non-Cirrhotic	Mono-infected
118	1356221	Female	1	non-PWID	SVR	SVR	Non-Cirrhotic	Mono-infected
119	1909316	Male	1	PWID	SVR	SVR	Cirrhotic	Mono-infected
120	137900	Male	1	PWID	Relapser	non-SVR	Non-Cirrhotic	Mono-infected
121	3614010	Female	1	non-PWID	SVR	SVR	Non-Cirrhotic	Mono-infected
122	52465	Male	3	PWID	SVR	SVR	Non-Cirrhotic	Mono-infected
123	263803	Male	3	non-PWID	Relapser	non-SVR	Non-Cirrhotic	Mono-infected
124	686480	Male	1	PWID	SVR	SVR	Non-Cirrhotic	Mono-infected
125	955082	Male	1	PWID	SVR	SVR	Non-Cirrhotic	Mono-infected
126	655291	Male	3	PWID	SVR	SVR	Non-Cirrhotic	Mono-infected
127		Male	3	PWID	SVR	SVR	Non-Cirrhotic	Mono-infected
128	881937	Male	5	PWID	Relapser	non-SVR	Non-Cirrhotic	Mono-infected
129	2224230	Male	2	PWID	SVR	SVR	Non-Cirrhotic	Mono-infected
130	558259	Male	1	PWID	Relapser	non-SVR	Non-Cirrhotic	Mono-infected
131	379151	Male	3	PWID	SVR	SVR	Non-Cirrhotic	Mono-infected
132	3405020	Female	3	non-PWID	SVR	SVR	Non-Cirrhotic	Mono-infected
133	53370	Male	2	PWID	SVR	SVR	Non-Cirrhotic	Mono-infected
134	1093500	Male	1	PWID	SVR	SVR	Non-Cirrhotic	Mono-infected
135	237152	Male	3	PWID	Non-Responder	non-SVR	Non-Cirrhotic	Mono-infected
136	1178203	Male	3	PWID	SVR	SVR	Non-Cirrhotic	Mono-infected
137	202032	Male	1	PWID	SVR	SVR	Non-Cirrhotic	Mono-infected
138	3263190	Male	1	PWID	SVR	SVR	Non-Cirrhotic	Mono-infected
139	990420	Male	3	PWID	SVR	SVR	Non-Cirrhotic	Mono-infected
140	881747	Male	1	non-PWID	SVR	SVR	Non-Cirrhotic	Mono-infected
141	1974440	Male	1	PWID	LTF	non-SVR	Non-Cirrhotic	Mono-infected
142	1224330	Male	1	PWID	SVR	SVR	Non-Cirrhotic	Mono-infected
143	145616	Male	3	PWID	Relapser	non-SVR	Non-Cirrhotic	Mono-infected
144	147835	Female	3	PWID	SVR	SVR	Non-Cirrhotic	Mono-infected
145	119942	Male	3	PWID	SVR	SVR	Cirrhotic	Mono-infected
146	1975970	Female	3	PWID	SVR	SVR	Non-Cirrhotic	Mono-infected
147	1195940	Male	3	PWID	SVR	SVR	Non-Cirrhotic	Mono-infected
148	1290780	Female	3	PWID	SVR	SVR	Cirrhotic	Mono-infected
149	74784	Female	3	PWID	SVR	SVR	Cirrhotic	Mono-infected
150	1278720	Male	3	PWID	SVR	SVR	Non-Cirrhotic	Mono-infected
151	580794	Male	3	PWID	SVR	SVR	Non-Cirrhotic	Mono-infected
152	188503	Male	1	PWID	SVR	SVR	Non-Cirrhotic	Mono-infected
153	34539	Male	3	PWID	SVR	SVR	Non-Cirrhotic	Mono-infected
154	148984	Male	3	PWID	Supsended	non-SVR	Non-Cirrhotic	Mono-infected
155	57226	Male	3	non-PWID	Supsended	non-SVR	Non-Cirrhotic	Mono-infected
156	600299	Male	1	PWID	Supsended	non-SVR	Non-Cirrhotic	Mono-infected
157	88144	Male	1	PWID	Non-Responder	non-SVR	Non-Cirrhotic	Mono-infected
158	5614750	Male	1	PWID	Non-Responder	non-SVR	Non-Cirrhotic	Mono-infected
159	871434	Male	1	PWID	Supsended	non-SVR	Non-Cirrhotic	Mono-infected
160	151198	Male	1	PWID	Supsended	non-SVR	Non-Cirrhotic	Mono-infected
161		Male	1	PWID	SVR	SVR	Non-Cirrhotic	Mono-infected
162	275414	Male	1	PWID	Supsended	non-SVR	Non-Cirrhotic	Mono-infected
163	3258450	Male	3	PWID	Non-Responder	non-SVR	Non-Cirrhotic	Mono-infected
164	24072	Male	3	non-PWID	Supsended	non-SVR	Non-Cirrhotic	Mono-infected
165		Male	3	non-PWID	Supsended	non-SVR	Cirrhotic	Mono-infected
166	218228	Male	3	PWID	LTF	non-SVR	Non-Cirrhotic	Mono-infected
167	2923076	Female	1	PWID	LTF	non-SVR	Non-Cirrhotic	Mono-infected
168	423076	Male	1	non-PWID	SVR	SVR	Non-Cirrhotic	Mono-infected
169	288461	Male	1	PWID	SVR	SVR	Non-Cirrhotic	Mono-infected
170	1923076	Male	1	PWID	Relapser	non-SVR	Non-Cirrhotic	Mono-infected
171	923076	Male	3	PWID	Relapser	non-SVR	Cirrhotic	Mono-infected
172	75298	Male	3	non-PWID	SVR	SVR	Cirrhotic	Mono-infected
173	2115384	Male	1	PWID	Relapser	non-SVR	Non-Cirrhotic	Mono-infected
174	121323	Male	1	PWID	SVR	SVR	Non-Cirrhotic	Mono-infected
175	2596153	Male	1	PWID	SVR	SVR	Non-Cirrhotic	Mono-infected
176	2038	Male	3	PWID	SVR	SVR	Non-Cirrhotic	Mono-infected
177	121838	Male	3	PWID	SVR	SVR	Non-Cirrhotic	Mono-infected
178	4615384	Male	3	PWID	Non-Responder	non-SVR	Non-Cirrhotic	Mono-infected
179	4741390	Female	1	PWID	Relapser	non-SVR	Non-Cirrhotic	Mono-infected
180	949917	Male	4	PWID	SVR	SVR	Non-Cirrhotic	Mono-infected
181	2596153	Male	3	PWID	SVR	SVR	Non-Cirrhotic	Mono-infected
182	615	Female	3	PWID	SVR	SVR	Non-Cirrhotic	Mono-infected
183	1121430	Male	2	PWID	SVR	SVR	Non-Cirrhotic	Mono-infected
184	222083	Male	1	PWID	Non-Responder	non-SVR	Cirrhotic	Mono-infected
185	192307	Male	3	PWID	SVR	SVR	Non-Cirrhotic	Mono-infected
186	1634615	Female	1	PWID	SVR	SVR	Non-Cirrhotic	Mono-infected
187	576923	Male	3	PWID	LTF	non-SVR	Non-Cirrhotic	Mono-infected
188	97765	Male	1	PWID	SVR	SVR	Non-Cirrhotic	Mono-infected
189	1288461	Male	1	PWID	SVR	SVR	Non-Cirrhotic	Mono-infected
190	7692307	Male	3	PWID	Relapser	non-SVR	Non-Cirrhotic	Mono-infected
191	293843	Male	1	PWID	SVR	SVR	Non-Cirrhotic	Mono-infected
192	230769	Male	1	PWID	SVR	SVR	Non-Cirrhotic	Mono-infected
193	58948	Female	3	PWID	SVR	SVR	Non-Cirrhotic	Mono-infected
194	1760272	Male	3	PWID	Supsended	non-SVR	Non-Cirrhotic	Mono-infected
195	44035	Male	1	PWID	SVR	SVR	Non-Cirrhotic	Mono-infected
196	480769	Male	1	PWID	SVR	SVR	Non-Cirrhotic	Mono-infected
197	1403846	Female	3	PWID	SVR	SVR	Non-Cirrhotic	Mono-infected
198	1995935	Female	3	PWID	SVR	SVR	Non-Cirrhotic	Mono-infected
199	42536	Male	1	PWID	SVR	SVR	Non-Cirrhotic	Mono-infected
200	1750000	Male	1	PWID	SVR	SVR	Non-Cirrhotic	Mono-infected
201	108936	Female	3	PWID	SVR	SVR	Non-Cirrhotic	Mono-infected
202	782626	Male	1	PWID	SVR	SVR	Non-Cirrhotic	Mono-infected
203	404984	Male	3	PWID	SVR	SVR	Non-Cirrhotic	Mono-infected
204	22111	Male	3	PWID	SVR	SVR	Non-Cirrhotic	Mono-infected
205	2282240	Male	1	PWID	SVR	SVR	Non-Cirrhotic	Mono-infected
206	4200000	Male	1	PWID	Non-Responder	non-SVR	Non-Cirrhotic	Mono-infected
207	1348110	Male	3	non-PWID	SVR	SVR	Non-Cirrhotic	Mono-infected
208	5205078	Female	1	PWID	Non-Responder	non-SVR	Cirrhotic	Mono-infected
209	344106	Male	3	PWID	SVR	SVR	Non-Cirrhotic	Mono-infected
210	615	Female	3	PWID	Supsended	non-SVR	Cirrhotic	Mono-infected
211	1906524	Male	3	PWID	SVR	SVR	Non-Cirrhotic	Mono-infected
212	738375	Male	3	PWID	SVR	SVR	Non-Cirrhotic	Mono-infected
213	287635	Male	3	PWID	Non-Responder	non-SVR	Non-Cirrhotic	Mono-infected
214	9686738	Male	1	PWID	Non-Responder	non-SVR	Non-Cirrhotic	Mono-infected
215	6792718	Male	3	PWID	Relapser	non-SVR	Non-Cirrhotic	Mono-infected
216		Male	3	PWID	SVR	SVR	Non-Cirrhotic	Mono-infected
217		Female	3	non-PWID	SVR	SVR	Non-Cirrhotic	Mono-infected
218	46936	Female	3	PWID	SVR	SVR	Non-Cirrhotic	Mono-infected
219	67061	Male	3	PWID	Supsended	non-SVR	Non-Cirrhotic	Mono-infected
220	1285667	Male	3	PWID	SVR	SVR	Non-Cirrhotic	Mono-infected
221	3120894	Male	3	non-PWID	Relapser	non-SVR	Non-Cirrhotic	Mono-infected
222	946654	Male	3	PWID	SVR	SVR	Cirrhotic	Mono-infected
223	3971596	Male	3	PWID	SVR	SVR	Non-Cirrhotic	Mono-infected
224	724485	Male	3	non-PWID	SVR	SVR	Non-Cirrhotic	Mono-infected
225	4654775	Male	3	PWID	SVR	SVR	Non-Cirrhotic	Mono-infected
226	184083	Male	3	PWID	SVR	SVR	Non-Cirrhotic	Mono-infected
227		Male	3	PWID	SVR	SVR	Non-Cirrhotic	Mono-infected
228	20569	Male	3	PWID	LTF	non-SVR	Non-Cirrhotic	Mono-infected
229	420330	Female	1	PWID	Non-Responder	non-SVR	Non-Cirrhotic	Mono-infected
230	14600741	Male	1	PWID	Non-Responder	non-SVR	Non-Cirrhotic	Mono-infected
231	85017	Male	1	non-PWID	SVR	SVR	Non-Cirrhotic	Mono-infected
232	1110349	Female	1	PWID	SVR	SVR	Non-Cirrhotic	Mono-infected
233	2000000	Male	1	PWID	SVR	SVR	Non-Cirrhotic	Mono-infected
234	5298	Male	3	PWID	Relapser	non-SVR	Cirrhotic	Mono-infected
235	5200000	Male	1	PWID	SVR	SVR	Non-Cirrhotic	Mono-infected
236	6500000	Male	1	PWID	SVR	SVR	Non-Cirrhotic	Mono-infected
237	8464899	Male	3	PWID	SVR	SVR	Non-Cirrhotic	Mono-infected
238	56909	Male	1	PWID	Non-Responder	non-SVR	Non-Cirrhotic	Mono-infected
239	2123257	Male	1	PWID	SVR	SVR	Non-Cirrhotic	Mono-infected
240	74433	Male	1	PWID	SVR	SVR	Cirrhotic	Mono-infected
241	1560842	Male	1	PWID	SVR	SVR	Non-Cirrhotic	Mono-infected
242	151871	Female	1	non-PWID	SVR	SVR	Non-Cirrhotic	Mono-infected
243	5012596	Male	1	PWID	Supsended	non-SVR	Non-Cirrhotic	Mono-infected
244	977105	Male	1	PWID	LTF	non-SVR	Non-Cirrhotic	Mono-infected
245	620561	Female	3	PWID	SVR	SVR	Cirrhotic	Mono-infected
246	6200000	Male	1	non-PWID	Supsended	non-SVR	Cirrhotic	Mono-infected
247	1200000	Male	1	PWID	SVR	SVR	Non-Cirrhotic	Mono-infected
248	50431	Female	1	non-PWID	Relapser	non-SVR	Non-Cirrhotic	Mono-infected
249	13802015	Female	4	non-PWID	SVR	SVR	Non-Cirrhotic	Mono-infected
250	4500000	Male	1	PWID	SVR	SVR	Non-Cirrhotic	Mono-infected
251	951699	Male	1	PWID	SVR	SVR	Non-Cirrhotic	Mono-infected
252	2700000	Female	3	PWID	SVR	SVR	Non-Cirrhotic	Mono-infected
253	6767051	Male	1	PWID	Supsended	non-SVR	Non-Cirrhotic	Mono-infected
254	2135163	Male	3	PWID	SVR	SVR	Non-Cirrhotic	Mono-infected
255	4462685	Male	2	PWID	SVR	SVR	Non-Cirrhotic	Mono-infected
256	666353	Male	1	PWID	Non-Responder	non-SVR	Non-Cirrhotic	Mono-infected
257	1174095	Male	3	PWID	LTF	non-SVR	Non-Cirrhotic	Mono-infected
258	788323	Male	1	PWID	SVR	SVR	Non-Cirrhotic	Mono-infected
259	5278370	Male	3	PWID	SVR	SVR	Cirrhotic	Mono-infected
260	7500000	Male	1	PWID	LTF	non-SVR	Non-Cirrhotic	Mono-infected
261	2000000	Male	3	PWID	Supsended	non-SVR	Non-Cirrhotic	Mono-infected
262	3600000	Male	3	PWID	SVR	SVR	Cirrhotic	Mono-infected
263	905669	Male	1	PWID	Non-Responder	non-SVR	Non-Cirrhotic	Mono-infected
264	4723114	Male	1	non-PWID	Non-Responder	non-SVR	Non-Cirrhotic	Mono-infected
265	8831265	Female	3	PWID	SVR	SVR	Non-Cirrhotic	Mono-infected
266	7126757	Male	1	PWID	SVR	SVR	Non-Cirrhotic	Mono-infected
267	3204138	Female	1	PWID	Non-Responder	non-SVR	Cirrhotic	Mono-infected
268	1300000	Male	1	non-PWID	Non-Responder	non-SVR	Non-Cirrhotic	Mono-infected
269	1174095	Male	1	PWID	Non-Responder	non-SVR	Non-Cirrhotic	Mono-infected
270	8819652	Female	1	non-PWID	SVR	SVR	Non-Cirrhotic	Mono-infected
271	1525929	Male	2	PWID	SVR	SVR	Non-Cirrhotic	Mono-infected
272	17200012	Male	3	PWID	SVR	SVR	Non-Cirrhotic	Mono-infected
273	6145175	Male	1	PWID	Relapser	non-SVR	Non-Cirrhotic	Mono-infected
274	7400000	Female	1	PWID	Non-Responder	non-SVR	Non-Cirrhotic	Mono-infected
275	12361	Male	1	PWID	LTF	non-SVR	Non-Cirrhotic	Mono-infected
276	3600000	Male	1	PWID	Non-Responder	non-SVR	Cirrhotic	Mono-infected
277	905669	Male	1	PWID	SVR	SVR	Non-Cirrhotic	Mono-infected
278	4723114	Female	1	PWID	SVR	SVR	Non-Cirrhotic	Mono-infected
279	8831265	Male	1	PWID	LTF	non-SVR	Non-Cirrhotic	Mono-infected
280	7126757	Female	1	PWID	Supsended	non-SVR	Non-Cirrhotic	Mono-infected
281	3204138	Male	1	PWID	SVR	SVR	Cirrhotic	Mono-infected
282	758635	Male	3	PWID	SVR	SVR	Non-Cirrhotic	Mono-infected
283	1400000	Male	3	PWID	SVR	SVR	Non-Cirrhotic	Mono-infected
284	11800000	Male	3	PWID	SVR	SVR	Non-Cirrhotic	Mono-infected
285	1900000	Male	4	non-PWID	Non-Responder	non-SVR	Non-Cirrhotic	Mono-infected
286	1200000	Male	3	non-PWID	Non-Responder	non-SVR	Non-Cirrhotic	Mono-infected
287	711634	Male	3	PWID	SVR	SVR	Non-Cirrhotic	Mono-infected
288	1300000	Male	1	PWID	Non-Responder	non-SVR	Non-Cirrhotic	Mono-infected
289	11000000	Female	3	PWID	Non-Responder	non-SVR	Non-Cirrhotic	Mono-infected
290	13802015	Male	1	PWID	Non-Responder	non-SVR	Non-Cirrhotic	Mono-infected
291	8819652	Male	1	PWID	SVR	SVR	Non-Cirrhotic	Mono-infected
292	5354865	Male	3	non-PWID	SVR	SVR	Non-Cirrhotic	Mono-infected
293	1525929	Male	1	PWID	Relapser	non-SVR	Non-Cirrhotic	Mono-infected
294	5030883	Male	3	PWID	SVR	SVR	Non-Cirrhotic	Mono-infected
295	17200012	Male	1	PWID	Non-Responder	non-SVR	Non-Cirrhotic	Mono-infected
296	24153250	Female	3	PWID	Relapser	non-SVR	Non-Cirrhotic	Mono-infected
297	454829	Female	3	PWID	LTF	non-SVR	Non-Cirrhotic	Mono-infected
298	444898	Male	3	PWID	Supsended	non-SVR	Non-Cirrhotic	Mono-infected
299	6145175	Male	1	PWID	Non-Responder	non-SVR	Non-Cirrhotic	Mono-infected
300	7400000	Male	1	PWID	Relapser	non-SVR	Non-Cirrhotic	Mono-infected
301	9500000	Female	3	PWID	SVR	SVR	Non-Cirrhotic	Mono-infected
302	907974	Male	3	PWID	SVR	SVR	Non-Cirrhotic	Mono-infected
303	12361	Female	1	PWID	LTF	non-SVR	Non-Cirrhotic	Mono-infected
304	13000000	Male	1	PWID	SVR	SVR	Non-Cirrhotic	Mono-infected
305	761115	Female	1	PWID	Non-Responder	non-SVR	Non-Cirrhotic	Mono-infected
306	1300000	Male	3	non-PWID	Supsended	non-SVR	Non-Cirrhotic	Mono-infected
307	661018	Male	1	PWID	Non-Responder	non-SVR	Non-Cirrhotic	Mono-infected
308	144857	Female	1	PWID	Relapser	non-SVR	Non-Cirrhotic	Mono-infected
309	6000000	Female	1	non-PWID	SVR	SVR	Non-Cirrhotic	Mono-infected
310	3600000	Female	2	non-PWID	SVR	SVR	Non-Cirrhotic	Mono-infected
311	10000000	Male	1	PWID	Relapser	non-SVR	Non-Cirrhotic	Mono-infected
312	6900000	Male	3	PWID	SVR	SVR	Non-Cirrhotic	Mono-infected
313	21000000	Male	3	PWID	SVR	SVR	Non-Cirrhotic	Mono-infected
314	1046185	Male	3	PWID	Relapser	non-SVR	Non-Cirrhotic	Mono-infected
315	841271	Female	1	PWID	SVR	SVR	Non-Cirrhotic	Mono-infected
316	4054164	Male	1	PWID	Supsended	non-SVR	Non-Cirrhotic	Mono-infected
317	155812	Female	1	PWID	SVR	SVR	Non-Cirrhotic	Mono-infected
318	681202	Male	1	PWID	SVR	SVR	Non-Cirrhotic	Mono-infected
319	204622	Male	3	PWID	SVR	SVR	Non-Cirrhotic	Mono-infected
320	8330298	Male	1	PWID	SVR	SVR	Non-Cirrhotic	Mono-infected
321	41634392	Male	1	non-PWID	SVR	SVR	Non-Cirrhotic	Mono-infected
322	2314874	Female	3	PWID	Supsended	non-SVR	Non-Cirrhotic	Mono-infected
323	8330298	Male	3	PWID	Relapser	non-SVR	Non-Cirrhotic	Mono-infected
324	11314	Female	1	PWID	SVR	SVR	Non-Cirrhotic	Mono-infected
325	187230	Female	3	PWID	SVR	SVR	Non-Cirrhotic	Mono-infected
326	1900000	Female	4	non-PWID	SVR	SVR	Non-Cirrhotic	Mono-infected
327	12000000	Male	3	PWID	SVR	SVR	Non-Cirrhotic	Mono-infected
328	3800000	Male	1	PWID	SVR	SVR	Non-Cirrhotic	Mono-infected
329	3000000	Male	3	non-PWID	SVR	SVR	Non-Cirrhotic	Mono-infected
330	1580	Male	1	PWID	SVR	SVR	Non-Cirrhotic	Mono-infected
331	6400000	Male	3	PWID	SVR	SVR	Cirrhotic	Mono-infected
332	74504	Male	3	non-PWID	SVR	SVR	Non-Cirrhotic	Mono-infected
333	44000000	Male	3	non-PWID	SVR	SVR	Non-Cirrhotic	Mono-infected
334	7300000	Male	1	PWID	Relapser	non-SVR	Cirrhotic	Mono-infected
335	10000000	Male	1	PWID	SVR	SVR	Cirrhotic	Mono-infected
336	35000000	Male	3	PWID	SVR	SVR	Non-Cirrhotic	Mono-infected
337	3000000	Female	3	non-PWID	SVR	SVR	Non-Cirrhotic	Mono-infected
338	630473	Male	3	PWID	Supsended	non-SVR	Non-Cirrhotic	Mono-infected
339	1200000	Male	3	PWID	Relapser	non-SVR	Non-Cirrhotic	Mono-infected
340	731408	Male	3	PWID	Supsended	non-SVR	Non-Cirrhotic	Mono-infected
341	17516556	Male	1	non-PWID	SVR	SVR	Non-Cirrhotic	Mono-infected
342	1631612	Male	3	PWID	Supsended	non-SVR	Non-Cirrhotic	Mono-infected
343	24422230	Male	1	PWID	SVR	SVR	Non-Cirrhotic	Mono-infected
344	7706341	Male	3	non-PWID	SVR	SVR	Non-Cirrhotic	Mono-infected
345	9377220	Male	1	PWID	Non-Responder	non-SVR	Non-Cirrhotic	Mono-infected
346	4580137	Male	3	PWID	Relapser	non-SVR	Non-Cirrhotic	Mono-infected
347	17981270	Male	1	PWID	Relapser	non-SVR	Non-Cirrhotic	Mono-infected
348	17015	Female	1	non-PWID	SVR	SVR	Non-Cirrhotic	Mono-infected
349	9911943	Male	3	PWID	SVR	SVR	Non-Cirrhotic	Mono-infected
350	4583393	Male	1	non-PWID	Non-Responder	non-SVR	Non-Cirrhotic	Mono-infected
351	4727732	Male	3	PWID	SVR	SVR	Non-Cirrhotic	Mono-infected
352	67982208	Male	1	PWID	Non-Responder	non-SVR	Non-Cirrhotic	Mono-infected
353	600209	Male	3	PWID	SVR	SVR	Non-Cirrhotic	Mono-infected
354	19592058	Male	6	PWID	SVR	SVR	Non-Cirrhotic	Mono-infected
355	3250881	Male	1	PWID	SVR	SVR	Non-Cirrhotic	Mono-infected
356	5220230	Male	3	PWID	SVR	SVR	Non-Cirrhotic	Mono-infected
357	14705961	Female	3	PWID	Supsended	non-SVR	Non-Cirrhotic	Mono-infected
358	151108	Male	3	PWID	LTF	non-SVR	Non-Cirrhotic	Mono-infected
359	39476	Female	3	non-PWID	SVR	SVR	Non-Cirrhotic	Mono-infected
360	602812	Female	3	non-PWID	SVR	SVR	Non-Cirrhotic	Mono-infected
361	2247153	Female	1	non-PWID	SVR	SVR	Non-Cirrhotic	Mono-infected
362	2701765	Male	3	non-PWID	Supsended	non-SVR	Cirrhotic	Mono-infected
363	20721560	Male	3	non-PWID	SVR	SVR	Non-Cirrhotic	Mono-infected
364	18623112	Male	1	PWID	Relapser	non-SVR	Non-Cirrhotic	Mono-infected
365	3708373	Male	3	PWID	SVR	SVR	Non-Cirrhotic	Mono-infected
366	9731259	Female	3	PWID	SVR	SVR	Cirrhotic	Mono-infected
367	3666425	Male	3	PWID	Relapser	non-SVR	Non-Cirrhotic	Mono-infected
368	464579	Female	1	PWID	SVR	SVR	Non-Cirrhotic	Mono-infected
369	1161621	Male	3	PWID	SVR	SVR	Cirrhotic	Mono-infected
370	1381101	Male	3	PWID	SVR	SVR	Non-Cirrhotic	Mono-infected
371	15320570	Male	3	PWID	SVR	SVR	Non-Cirrhotic	Mono-infected
372	2200223	Male	1	PWID	SVR	SVR	Non-Cirrhotic	Mono-infected
373	35047	Male	1	PWID	SVR	SVR	Non-Cirrhotic	Mono-infected
374	552136	Male	3	PWID	SVR	SVR	Cirrhotic	Mono-infected
375	2050320	Male	3	PWID	SVR	SVR	Non-Cirrhotic	Mono-infected
376	13797698	Male	3	PWID	Relapser	non-SVR	Cirrhotic	Mono-infected
377	6625565	Male	1	PWID	LTF	non-SVR	Non-Cirrhotic	Mono-infected
378	1684080	Male	1	PWID	Supsended	non-SVR	Non-Cirrhotic	Mono-infected
379	7502542	Female	1	PWID	LTF	non-SVR	Non-Cirrhotic	Mono-infected
380	5097432	Male	3	PWID	SVR	SVR	Non-Cirrhotic	Mono-infected
381	463073	Male	3	non-PWID	SVR	SVR	Non-Cirrhotic	Mono-infected
382	17905554	Male	1	PWID	SVR	SVR	Non-Cirrhotic	Mono-infected
383	2080493	Male	1	PWID	SVR	SVR	Non-Cirrhotic	Mono-infected
384	3263640	Male	3	PWID	Relapser	non-SVR	Non-Cirrhotic	Mono-infected
385	5518	Female	3	PWID	LTF	non-SVR	Non-Cirrhotic	Mono-infected
386	4800000	Male	3	PWID	SVR	SVR	Non-Cirrhotic	Mono-infected
387		Male	1	PWID	SVR	SVR	Non-Cirrhotic	Mono-infected
388	1000000	Male	3	PWID	SVR	SVR	Non-Cirrhotic	Mono-infected
389	14736	Male	3	PWID	SVR	SVR	Cirrhotic	Mono-infected
390	24287406	Male	3	PWID	SVR	SVR	Non-Cirrhotic	Mono-infected
391	12759459	Male	3	PWID	SVR	SVR	Non-Cirrhotic	Mono-infected
392	4082809	Male	3	PWID	SVR	SVR	Non-Cirrhotic	Mono-infected
393	60811	Male	3	PWID	SVR	SVR	Non-Cirrhotic	Mono-infected
394	343814	Male	3	non-PWID	SVR	SVR	Non-Cirrhotic	Mono-infected
395	696419	Male	1	PWID	Supsended	non-SVR	Non-Cirrhotic	Mono-infected
396	1293288	Male	3	PWID	Supsended	non-SVR	Non-Cirrhotic	Mono-infected
397	13972301	Male	1	PWID	LTF	non-SVR	Non-Cirrhotic	Mono-infected
398	9906685	Male	1	PWID	Relapser	non-SVR	Non-Cirrhotic	Mono-infected
399	11593435	Male	1	PWID	Relapser	non-SVR	Non-Cirrhotic	Mono-infected
400	3100000	Male	3	PWID	Non-Responder	non-SVR	Non-Cirrhotic	Mono-infected
401	1472462	Male	4	PWID	Non-Responder	non-SVR	Non-Cirrhotic	Mono-infected
402	266793	Male	4	non-PWID	SVR	SVR	Non-Cirrhotic	Mono-infected
403	2499064	Male	3	PWID	Supsended	non-SVR	Cirrhotic	Mono-infected
404	395598	Male	3	PWID	SVR	SVR	Non-Cirrhotic	Mono-infected
405	247510	Male	3	PWID	SVR	SVR	Non-Cirrhotic	Mono-infected
406	2218756	Male	3	PWID	LTF	non-SVR	Non-Cirrhotic	Mono-infected
407	2300000	Female	3	PWID	LTF	non-SVR	Non-Cirrhotic	Mono-infected
408	1300000	Male	3	PWID	SVR	SVR	Non-Cirrhotic	Mono-infected
409	603795	Male	3	PWID	LTF	non-SVR	Cirrhotic	Mono-infected
410	528267	Female	2	PWID	SVR	SVR	Non-Cirrhotic	Mono-infected
411	15406	Female	3	PWID	SVR	SVR	Non-Cirrhotic	Mono-infected
412	2807228	Male	3	non-PWID	Relapser	non-SVR	Non-Cirrhotic	Mono-infected
413	1900000	Male	3	PWID	SVR	SVR	Non-Cirrhotic	Mono-infected
414	3333535	Male	3	non-PWID	SVR	SVR	Non-Cirrhotic	Mono-infected
415	1532505	Male	1	non-PWID	SVR	SVR	Non-Cirrhotic	Mono-infected
416	306147	Male	1	PWID	SVR	SVR	Non-Cirrhotic	Mono-infected
417	932598	Male	3	non-PWID	SVR	SVR	Cirrhotic	Mono-infected
418	44467	Male	1	non-PWID	SVR	SVR	Non-Cirrhotic	Mono-infected
419	394724	Female	1	non-PWID	Relapser	non-SVR	Non-Cirrhotic	Mono-infected
420	247637	Male	3	non-PWID	Non-Responder	non-SVR	Cirrhotic	Mono-infected
421	641955	Male	1	non-PWID	Non-Responder	non-SVR	Non-Cirrhotic	Mono-infected
422		Male	3	PWID	SVR	SVR	Non-Cirrhotic	Mono-infected
423		Male	1	PWID	SVR	SVR	Non-Cirrhotic	Mono-infected
424		Female	3	PWID	SVR	SVR	Non-Cirrhotic	Mono-infected
425	3173076	Female	1	PWID	SVR	SVR	Non-Cirrhotic	Mono-infected
426	1153260	Male	3	PWID	Relapser	non-SVR	Cirrhotic	Mono-infected
427	36712	Female	3	PWID	Relapser	non-SVR	Non-Cirrhotic	Mono-infected
428	177920	Male	1	non-PWID	SVR	SVR	Non-Cirrhotic	Mono-infected
429	431375	Male	1	PWID	Supsended	non-SVR	Non-Cirrhotic	Mono-infected
430	108763	Male	1	non-PWID	LTF	non-SVR	Non-Cirrhotic	Mono-infected
431	728359	Female	1	PWID	LTF	non-SVR	Non-Cirrhotic	Mono-infected
432	621777	Female	3	PWID	LTF	non-SVR	Non-Cirrhotic	Mono-infected
433	42785	Female	1	non-PWID	SVR	SVR	Non-Cirrhotic	Mono-infected
434	470543	Female	1	non-PWID	SVR	SVR	Cirrhotic	Mono-infected
435	2969820	Male	1	PWID	SVR	SVR	Non-Cirrhotic	Mono-infected
436	66092	Female	1	non-PWID	SVR	SVR	Non-Cirrhotic	Mono-infected
437	322268	Female	3	PWID	SVR	SVR	Non-Cirrhotic	Mono-infected
438	336377	Female	2	PWID	SVR	SVR	Non-Cirrhotic	Mono-infected
439	1061041	Male	3	non-PWID	SVR	SVR	Non-Cirrhotic	Mono-infected
440	1043922	Male	3	non-PWID	Relapser	non-SVR	Non-Cirrhotic	Mono-infected
441	890098	Male	3	non-PWID	Relapser	non-SVR	Cirrhotic	Mono-infected
442	9537274	Female	1	non-PWID	Relapser	non-SVR	Non-Cirrhotic	Mono-infected
443		Female	3	PWID	Relapser	non-SVR	Non-Cirrhotic	Mono-infected
444		Female	1	non-PWID	Non-Responder	non-SVR	Non-Cirrhotic	Mono-infected
445	753888	Female	1	non-PWID	Non-Responder	non-SVR	Non-Cirrhotic	Mono-infected
446		Female	1	non-PWID	SVR	SVR	Cirrhotic	Mono-infected
447		Male	3	non-PWID	SVR	SVR	Non-Cirrhotic	Mono-infected
448		Male	6	non-PWID	Relapser	non-SVR	Non-Cirrhotic	Mono-infected
449	815626	Male	4	non-PWID	Non-Responder	non-SVR	Non-Cirrhotic	Mono-infected
450	1342665	Male	3	PWID	Relapser	non-SVR	Cirrhotic	Mono-infected
451		Female	1	non-PWID	SVR	SVR	Non-Cirrhotic	Mono-infected
452	8492331	Male	1	non-PWID	Non-Responder	non-SVR	Non-Cirrhotic	Mono-infected
453	5000000	Male	1	non-PWID	Non-Responder	non-SVR	Non-Cirrhotic	Mono-infected
454		Female	1	non-PWID	Non-Responder	non-SVR	Non-Cirrhotic	Mono-infected
455		Female	1	PWID	Supsended	non-SVR	Non-Cirrhotic	Mono-infected
456		Male	3	non-PWID	Supsended	non-SVR	Non-Cirrhotic	Mono-infected
457	1117388	Female	1	non-PWID	Relapser	non-SVR	Non-Cirrhotic	Mono-infected
458	1676003	Female	1	non-PWID	Non-Responder	non-SVR	Non-Cirrhotic	Mono-infected
459		Male	3	non-PWID	SVR	SVR	Non-Cirrhotic	Mono-infected
460		Female	2	non-PWID	SVR	SVR	Non-Cirrhotic	Mono-infected
461	1361983	Male	1	PWID	Non-Responder	non-SVR	Non-Cirrhotic	Mono-infected
462		Male	3	PWID	SVR	SVR	Non-Cirrhotic	Mono-infected
463		Male	3	non-PWID	SVR	SVR	Non-Cirrhotic	Mono-infected
464		Male	2	non-PWID	SVR	SVR	Non-Cirrhotic	Mono-infected
465		Male	4	non-PWID	Non-Responder	non-SVR	Non-Cirrhotic	Mono-infected
466		Male	1	non-PWID	SVR	SVR	Non-Cirrhotic	Mono-infected
467		Female	3	non-PWID	SVR	SVR	Non-Cirrhotic	Mono-infected
468		Male	1	non-PWID	Relapser	non-SVR	Non-Cirrhotic	Mono-infected
469		Male	3	non-PWID	SVR	SVR	Non-Cirrhotic	Mono-infected
470		Male	1	PWID	SVR	SVR	Non-Cirrhotic	Mono-infected
471		Male	1	PWID	Relapser	non-SVR	Cirrhotic	Mono-infected
472		Male	1	PWID	Relapser	non-SVR	Cirrhotic	Mono-infected
473		Male	3	PWID	Non-Responder	non-SVR	Cirrhotic	Mono-infected
474		Female	4	non-PWID	Non-Responder	non-SVR	Non-Cirrhotic	Mono-infected
475		Male	1	non-PWID	Non-Responder	non-SVR	Non-Cirrhotic	Mono-infected
476		Male	3	PWID	SVR	SVR	Non-Cirrhotic	Mono-infected
477		Female	3	non-PWID	SVR	SVR	Non-Cirrhotic	Mono-infected
478		Male	1	non-PWID	SVR	SVR	Non-Cirrhotic	Mono-infected
479	898015	Male	1	non-PWID	Relapser	non-SVR	Non-Cirrhotic	Mono-infected
480	611484	Male	4	non-PWID	Supsended	non-SVR	Non-Cirrhotic	Mono-infected
481		Male	3	non-PWID	Supsended	non-SVR	Non-Cirrhotic	Mono-infected
482		Female	1	non-PWID	Supsended	non-SVR	Non-Cirrhotic	Mono-infected
483		Female	3	non-PWID	Supsended	non-SVR	Non-Cirrhotic	Mono-infected
484		Male	1	PWID	Supsended	non-SVR	Non-Cirrhotic	Mono-infected
485	1277556	Male	3	non-PWID	SVR	SVR	Non-Cirrhotic	Mono-infected
486		Male	1	non-PWID	SVR	SVR	Non-Cirrhotic	Mono-infected
487	3637080	Male	1	non-PWID	Relapser	non-SVR	Cirrhotic	Mono-infected
488	20565	Female	1	non-PWID	Relapser	non-SVR	Non-Cirrhotic	Mono-infected
489		Female	1	non-PWID	SVR	SVR	Non-Cirrhotic	Mono-infected
490		Female	1	non-PWID	SVR	SVR	Non-Cirrhotic	Mono-infected
491		Male	3	non-PWID	SVR	SVR	Non-Cirrhotic	Mono-infected
492	597572	Female	1	non-PWID	Relapser	non-SVR	Non-Cirrhotic	Mono-infected
493		Male	1	PWID	SVR	SVR	Non-Cirrhotic	Mono-infected
494	1231885	Male	1	PWID	LTF	non-SVR	Cirrhotic	Mono-infected
495	215721	Male	1	non-PWID	Non-Responder	non-SVR	Non-Cirrhotic	Mono-infected
496		Female	1	non-PWID	Non-Responder	non-SVR	Non-Cirrhotic	Mono-infected
497		Female	3	PWID	SVR	SVR	Non-Cirrhotic	Mono-infected
498		Female	3	non-PWID	SVR	SVR	Non-Cirrhotic	Mono-infected
499	3076923	Male	3	PWID	Supsended	non-SVR	Non-Cirrhotic	Mono-infected
500	1730769	Female	1	non-PWID	Supsended	non-SVR	Non-Cirrhotic	Mono-infected
501		Female	1	non-PWID	Supsended	non-SVR	Non-Cirrhotic	Mono-infected
502	769230	Female	1	non-PWID	SVR	SVR	Non-Cirrhotic	Mono-infected
503	1326923	Male	3	non-PWID	SVR	SVR	Non-Cirrhotic	Mono-infected
504	2807692	Male	3	non-PWID	SVR	SVR	Non-Cirrhotic	Mono-infected
505	54490	Male	2	non-PWID	SVR	SVR	Non-Cirrhotic	Mono-infected
506	5384615	Male	3	PWID	SVR	SVR	Non-Cirrhotic	Mono-infected
507	492230	Male	3	non-PWID	SVR	SVR	Non-Cirrhotic	Mono-infected
508	2115384	Male	3	non-PWID	SVR	SVR	Non-Cirrhotic	Mono-infected
509	2057692	Male	3	PWID	SVR	SVR	Non-Cirrhotic	Mono-infected
510	230769	Male	2	PWID	SVR	SVR	Cirrhotic	Mono-infected
511	1858670	Female	2	non-PWID	Relapser	non-SVR	Non-Cirrhotic	Mono-infected
512		Female	1	non-PWID	Non-Responder	non-SVR	Non-Cirrhotic	Mono-infected
513		Male	1	non-PWID	Relapser	non-SVR	Non-Cirrhotic	Mono-infected
514	549814	Female	2	PWID	SVR	SVR	Non-Cirrhotic	Mono-infected
515		Male	1	non-PWID	SVR	SVR	Non-Cirrhotic	Mono-infected
516		Male	6	non-PWID	SVR	SVR	Non-Cirrhotic	Mono-infected
517	137265	Female	1	non-PWID	SVR	SVR	Non-Cirrhotic	Mono-infected
518	1969566	Female	3	PWID	SVR	SVR	Non-Cirrhotic	Mono-infected
519	3677818	Female	3	non-PWID	SVR	SVR	Non-Cirrhotic	Mono-infected
520		Female	3	non-PWID	SVR	SVR	Non-Cirrhotic	Mono-infected
521	3605721	Male	1	non-PWID	SVR	SVR	Non-Cirrhotic	Mono-infected
522		Female	1	non-PWID	SVR	SVR	Non-Cirrhotic	Mono-infected
523	95757	Male	3	non-PWID	SVR	SVR	Non-Cirrhotic	Mono-infected
524	37179	Male	3	non-PWID	SVR	SVR	Cirrhotic	Mono-infected
525	1318339	Male	1	non-PWID	Relapser	non-SVR	Non-Cirrhotic	Mono-infected
526		Male	1	non-PWID	SVR	SVR	Non-Cirrhotic	Mono-infected
527	2198240	Male	1	non-PWID	SVR	SVR	Non-Cirrhotic	Mono-infected
528	612641	Male	1	non-PWID	SVR	SVR	Non-Cirrhotic	Mono-infected
529		Female	3	non-PWID	SVR	SVR	Non-Cirrhotic	Mono-infected
530	1144200	Male	3	non-PWID	SVR	SVR	Non-Cirrhotic	Mono-infected
531	91916	Male	3	PWID	SVR	SVR	Non-Cirrhotic	Mono-infected
532		Female	3	non-PWID	SVR	SVR	Non-Cirrhotic	Mono-infected
533	1328334	Male	1	PWID	Relapser	non-SVR	Non-Cirrhotic	Mono-infected
534	690120	Female	1	non-PWID	LTF	non-SVR	Non-Cirrhotic	Mono-infected
535	1057692	Female	1	non-PWID	Supsended	non-SVR	Non-Cirrhotic	Mono-infected
536	3076744	Male	3	PWID	Supsended	non-SVR	Non-Cirrhotic	Mono-infected
537	1904834	Male	1	non-PWID	Supsended	non-SVR	Cirrhotic	Mono-infected
538	125426	Female	1	non-PWID	Relapser	non-SVR	Non-Cirrhotic	Mono-infected
539	557692	Male	1	non-PWID	Non-Responder	non-SVR	Cirrhotic	Mono-infected
540	1846153	Male	1	non-PWID	Non-Responder	non-SVR	Non-Cirrhotic	Mono-infected
541		Female	3	PWID	LTF	non-SVR	Non-Cirrhotic	Mono-infected
542	1076923	Male	1	non-PWID	SVR	SVR	Non-Cirrhotic	Mono-infected
543	769230	Female	1	non-PWID	SVR	SVR	Non-Cirrhotic	Mono-infected
544		Female	3	non-PWID	SVR	SVR	Non-Cirrhotic	Mono-infected
545	166985	Male	3	non-PWID	SVR	SVR	Non-Cirrhotic	Mono-infected
546	351844	Female	3	non-PWID	SVR	SVR	Cirrhotic	Mono-infected
547	92188	Male	3	non-PWID	SVR	SVR	Cirrhotic	Mono-infected
548	339739	Male	3	non-PWID	SVR	SVR	Non-Cirrhotic	Mono-infected
549	2140978	Male	3	PWID	SVR	SVR	Non-Cirrhotic	Mono-infected
550	943081	Male	3	non-PWID	SVR	SVR	Non-Cirrhotic	Mono-infected
551	2607590	Male	3	non-PWID	SVR	SVR	Non-Cirrhotic	Mono-infected
552	111912	Male	3	non-PWID	SVR	SVR	Non-Cirrhotic	Mono-infected
553	549811	Female	2	non-PWID	SVR	SVR	Non-Cirrhotic	Mono-infected
554	2436042	Male	3	non-PWID	SVR	SVR	Non-Cirrhotic	Mono-infected
555	111748	Male	3	PWID	SVR	SVR	Non-Cirrhotic	Mono-infected
556		Male	3	non-PWID	SVR	SVR	Non-Cirrhotic	Mono-infected
557	238812	Male	3	non-PWID	SVR	SVR	Non-Cirrhotic	Mono-infected
558	81444	Male	3	non-PWID	SVR	SVR	Cirrhotic	Mono-infected
559	1708667	Male	3	PWID	SVR	SVR	Non-Cirrhotic	Mono-infected
560	201377	Female	3	PWID	SVR	SVR	Non-Cirrhotic	Mono-infected
561	2083083	Male	3	PWID	SVR	SVR	Non-Cirrhotic	Mono-infected
562	378163	Male	3	non-PWID	SVR	SVR	Non-Cirrhotic	Mono-infected
563	192307	Male	1	non-PWID	Non-Responder	non-SVR	Non-Cirrhotic	Mono-infected
564	238184	Female	1	non-PWID	Non-Responder	non-SVR	Non-Cirrhotic	Mono-infected
565		Male	4	non-PWID	Non-Responder	non-SVR	Non-Cirrhotic	Mono-infected
566	1923076	Male	1	non-PWID	Relapser	non-SVR	Non-Cirrhotic	Mono-infected
567	557692	Female	1	non-PWID	SVR	SVR	Non-Cirrhotic	Mono-infected
568	1538461	Female	1	non-PWID	Relapser	non-SVR	Non-Cirrhotic	Mono-infected
569	1769230	Female	1	non-PWID	Relapser	non-SVR	Non-Cirrhotic	Mono-infected
570	692250	Male	1	non-PWID	Relapser	non-SVR	Non-Cirrhotic	Mono-infected
571	1522070	Female	1	non-PWID	Relapser	non-SVR	Cirrhotic	Mono-infected
572	531488	Male	3	non-PWID	Relapser	non-SVR	Non-Cirrhotic	Mono-infected
573	423708	Female	1	non-PWID	Non-Responder	non-SVR	Non-Cirrhotic	Mono-infected
574	7692307	Male	3	non-PWID	SVR	SVR	Non-Cirrhotic	Mono-infected
575	942307	Male	1	PWID	SVR	SVR	Non-Cirrhotic	Mono-infected
576	3066660	Male	3	PWID	Relapser	non-SVR	Non-Cirrhotic	Mono-infected
577	821707	Male	1	non-PWID	Relapser	non-SVR	Non-Cirrhotic	Mono-infected
578	1211538	Female	3	PWID	SVR	SVR	Non-Cirrhotic	Mono-infected
579	200125	Female	1	PWID	Non-Responder	non-SVR	Non-Cirrhotic	Mono-infected
580		Male	1	non-PWID	SVR	SVR	Cirrhotic	Mono-infected
581	114915	Female	1	PWID	Supsended	non-SVR	Cirrhotic	Mono-infected
582	615384	Female	1	non-PWID	SVR	SVR	Non-Cirrhotic	Mono-infected
583	190458	Male	1	non-PWID	SVR	SVR	Cirrhotic	Mono-infected
584	2598988	Male	1	PWID	SVR	SVR	Non-Cirrhotic	Mono-infected
585	67819	Male	4	non-PWID	SVR	SVR	Non-Cirrhotic	Mono-infected
586	58217	Male	5	non-PWID	SVR	SVR	Non-Cirrhotic	Mono-infected
587	29375	Male	3	PWID	SVR	SVR	Non-Cirrhotic	Mono-infected
588	750000	Female	3	PWID	SVR	SVR	Non-Cirrhotic	Mono-infected
589	774262	Male	1	non-PWID	Non-Responder	non-SVR	Cirrhotic	Mono-infected
590	1316795	Male	1	PWID	Relapser	non-SVR	Non-Cirrhotic	Mono-infected
591	815626	Male	4	non-PWID	Non-Responder	non-SVR	Non-Cirrhotic	Mono-infected
592		Male	1	non-PWID	SVR	SVR	Non-Cirrhotic	Mono-infected
593	61273	Female	1	non-PWID	SVR	SVR	Non-Cirrhotic	Mono-infected
594	1787078	Male	1	non-PWID	SVR	SVR	Non-Cirrhotic	Mono-infected
595	871341	Male	3	PWID	SVR	SVR	Non-Cirrhotic	Mono-infected
596	14104	Male	2	PWID	SVR	SVR	Cirrhotic	Mono-infected
597	2076923	Male	3	non-PWID	SVR	SVR	Non-Cirrhotic	Mono-infected
598	449516	Female	2	non-PWID	SVR	SVR	Non-Cirrhotic	Mono-infected
599	91708	Female	3	PWID	SVR	SVR	Non-Cirrhotic	Mono-infected
600	61273	Female	1	non-PWID	SVR	SVR	Non-Cirrhotic	Mono-infected
601	1847976	Male	1	PWID	SVR	SVR	Non-Cirrhotic	Mono-infected
602	1787078	Male	1	non-PWID	SVR	SVR	Non-Cirrhotic	Mono-infected
603	139318	Male	3	PWID	SVR	SVR	Non-Cirrhotic	Mono-infected
604	183612	Female	1	non-PWID	Relapser	non-SVR	Non-Cirrhotic	Mono-infected
605	4112000	Female	1	non-PWID	Relapser	non-SVR	Non-Cirrhotic	Mono-infected
606		Male	3	PWID	SVR	SVR	Cirrhotic	Mono-infected
607	677802	Male	3	PWID	Relapser	non-SVR	Non-Cirrhotic	Mono-infected
608	124767	Male	3	non-PWID	Relapser	non-SVR	Cirrhotic	Mono-infected
609	1346153	Male	3	PWID	Relapser	non-SVR	Cirrhotic	Mono-infected
610	387791	Male	3	non-PWID	SVR	SVR	Non-Cirrhotic	Mono-infected
611	1870878	Female	3	PWID	SVR	SVR	Non-Cirrhotic	Mono-infected
612	12365	Female	3	PWID	SVR	SVR	Non-Cirrhotic	Mono-infected
613	487739	Female	1	PWID	SVR	SVR	Non-Cirrhotic	Mono-infected
614	2207078	Female	1	non-PWID	SVR	SVR	Non-Cirrhotic	Mono-infected
615	2204392	Female	1	non-PWID	Relapser	non-SVR	Cirrhotic	Mono-infected
616	970194	Female	1	non-PWID	SVR	SVR	Non-Cirrhotic	Mono-infected
617	403846	Female	3	PWID	SVR	SVR	Non-Cirrhotic	Mono-infected
618	9043191	Male	3	non-PWID	SVR	SVR	Non-Cirrhotic	Mono-infected
619	18595288	Female	3	PWID	SVR	SVR	Non-Cirrhotic	Mono-infected
620	47805	Male	3	PWID	SVR	SVR	Non-Cirrhotic	Mono-infected
621	2632198	Female	3	PWID	SVR	SVR	Non-Cirrhotic	Mono-infected
622	5259037	Male	1	PWID	Non-Responder	non-SVR	Non-Cirrhotic	Mono-infected
623	3036222	Male	1	PWID	Relapser	non-SVR	Non-Cirrhotic	Mono-infected
624	1043922	Male	3	non-PWID	SVR	SVR	Non-Cirrhotic	Mono-infected
625	930642	Male	3	PWID	SVR	SVR	Non-Cirrhotic	Mono-infected
626	2252872	Female	3	PWID	Non-Responder	non-SVR	Non-Cirrhotic	Mono-infected
627	32451	Female	4	non-PWID	SVR	SVR	Non-Cirrhotic	Mono-infected
628	394970	Male	1	PWID	SVR	SVR	Non-Cirrhotic	Mono-infected
629	229085	Male	1	non-PWID	SVR	SVR	Non-Cirrhotic	Mono-infected
630	60153	Male	1	non-PWID	SVR	SVR	Non-Cirrhotic	Mono-infected
631	7290701	Male	1	PWID	Supsended	non-SVR	Non-Cirrhotic	Mono-infected
632	1381030	Male	1	non-PWID	SVR	SVR	Non-Cirrhotic	Mono-infected
633	8753442	Female	3	non-PWID	SVR	SVR	Non-Cirrhotic	Mono-infected
634	1016051	Male	3	non-PWID	SVR	SVR	Non-Cirrhotic	Mono-infected
635	9000852	Female	3	non-PWID	Non-Responder	non-SVR	Non-Cirrhotic	Mono-infected
636	477523	Female	3	PWID	SVR	SVR	Non-Cirrhotic	Mono-infected
637	1185689	Male	1	non-PWID	Supsended	non-SVR	Non-Cirrhotic	Mono-infected
638	4018842	Female	2	non-PWID	Supsended	non-SVR	Non-Cirrhotic	Mono-infected
639	3626970	Female	1	non-PWID	SVR	SVR	Non-Cirrhotic	Mono-infected
640	710576	Female	1	non-PWID	SVR	SVR	Non-Cirrhotic	Mono-infected
641	3663	Male	1	PWID	SVR	SVR	Non-Cirrhotic	Mono-infected
642	50041	Male	1	PWID	SVR	SVR	Non-Cirrhotic	Mono-infected
643	397348	Male	1	PWID	SVR	SVR	Non-Cirrhotic	Mono-infected
644	103835	Male	3	PWID	SVR	SVR	Non-Cirrhotic	Mono-infected
645	16310610	Male	2	PWID	SVR	SVR	Non-Cirrhotic	Mono-infected
646	1247265	Male	3	PWID	SVR	SVR	Non-Cirrhotic	Mono-infected
647	78344	Male	3	non-PWID	SVR	SVR	Non-Cirrhotic	Mono-infected
648	4063387	Male	3	PWID	SVR	SVR	Non-Cirrhotic	Mono-infected
649	19019716	Male	1	non-PWID	Non-Responder	non-SVR	Non-Cirrhotic	Mono-infected
650	22579860	Male	2	non-PWID	Non-Responder	non-SVR	Non-Cirrhotic	Mono-infected
651	550215	Male	3	non-PWID	Relapser	non-SVR	Cirrhotic	Mono-infected
652	2340000	Male	1	non-PWID	Relapser	non-SVR	Non-Cirrhotic	Mono-infected
653	4617174	Male	3	PWID	SVR	SVR	Cirrhotic	Mono-infected
654	1185689	Male	1	non-PWID	Supsended	non-SVR	Non-Cirrhotic	Mono-infected
655	698461	Male	4	PWID	Non-Responder	non-SVR	Non-Cirrhotic	Mono-infected
656	4617174	Male	3	PWID	SVR	SVR	Cirrhotic	Mono-infected
657	11386453	Female	1	non-PWID	SVR	SVR	Non-Cirrhotic	Mono-infected
658	261278	Female	1	non-PWID	SVR	SVR	Non-Cirrhotic	Mono-infected
659	6463003	Male	5	non-PWID	SVR	SVR	Non-Cirrhotic	Mono-infected
660	3985917	Male	1	non-PWID	SVR	SVR	Non-Cirrhotic	Mono-infected
661	1504177	Male	1	non-PWID	SVR	SVR	Non-Cirrhotic	Mono-infected
662	14330430	Male	3	non-PWID	SVR	SVR	Non-Cirrhotic	Mono-infected
663	25764892	Female	3	PWID	SVR	SVR	Non-Cirrhotic	Mono-infected
664	439613	Male	4	non-PWID	SVR	SVR	Non-Cirrhotic	Mono-infected
665	22920451	Male	1	PWID	SVR	SVR	Non-Cirrhotic	Mono-infected
666	170016	Female	1	non-PWID	SVR	SVR	Non-Cirrhotic	Mono-infected
667	31308710	Male	3	non-PWID	LTF	non-SVR	Non-Cirrhotic	Mono-infected
668	742545	Female	3	non-PWID	SVR	SVR	Non-Cirrhotic	Mono-infected
669	1495867	Male	1	non-PWID	Non-Responder	non-SVR	Cirrhotic	Mono-infected
670	5087927	Female	3	PWID	SVR	SVR	Non-Cirrhotic	Mono-infected
671	6215234	Male	3	PWID	Non-Responder	non-SVR	Non-Cirrhotic	Mono-infected
672	1300542	Female	3	non-PWID	SVR	SVR	Non-Cirrhotic	Mono-infected
673	6372705	Male	3	non-PWID	SVR	SVR	Non-Cirrhotic	Mono-infected
674	17577565	Male	3	PWID	SVR	SVR	Non-Cirrhotic	Mono-infected
675	2444810	Male	1	PWID	Non-Responder	non-SVR	Non-Cirrhotic	Mono-infected
676	3564674	Female	1	non-PWID	SVR	SVR	Non-Cirrhotic	Mono-infected
677	2392045	Male	3	PWID	SVR	SVR	Non-Cirrhotic	Mono-infected
678	790677	Male	1	PWID	SVR	SVR	Non-Cirrhotic	Mono-infected
679	4300123	Male	1	non-PWID	SVR	SVR	Non-Cirrhotic	Mono-infected
680	3580912	Male	1	non-PWID	SVR	SVR	Non-Cirrhotic	Mono-infected
681	4617174	Male	3	PWID	SVR	SVR	Cirrhotic	Mono-infected
682	16345013	Male	3	PWID	SVR	SVR	Cirrhotic	Mono-infected
683	6552113	Male	3	non-PWID	SVR	SVR	Non-Cirrhotic	Mono-infected
684	332256	Male	3	non-PWID	SVR	SVR	Non-Cirrhotic	Mono-infected
685	38301712	Male	3	PWID	SVR	SVR	Non-Cirrhotic	Mono-infected
686	1246444	Female	1	PWID	Non-Responder	non-SVR	Non-Cirrhotic	Mono-infected
687	630184	Female	1	non-PWID	Relapser	non-SVR	Non-Cirrhotic	Mono-infected
688	13481389	Male	1	non-PWID	Non-Responder	non-SVR	Non-Cirrhotic	Mono-infected
689	1205158	Male	3	non-PWID	Relapser	non-SVR	Non-Cirrhotic	Mono-infected
690	795492	Female	3	PWID	SVR	SVR	Cirrhotic	Mono-infected
691	659410	Female	3	non-PWID	SVR	SVR	Non-Cirrhotic	Mono-infected
692	405417	Female	3	non-PWID	SVR	SVR	Cirrhotic	Mono-infected
693	31308710	Male	3	non-PWID	LTF	non-SVR	Non-Cirrhotic	Mono-infected
694	4077325	Male	3	non-PWID	LTF	non-SVR	Non-Cirrhotic	Mono-infected
695	170016	Female	1	non-PWID	SVR	SVR	Non-Cirrhotic	Mono-infected
696	340995	Male	2	PWID	SVR	SVR	Non-Cirrhotic	Mono-infected
697	1746329	Male	1	PWID	SVR	SVR	Cirrhotic	Mono-infected
698	17577565	Male	3	PWID	SVR	SVR	Non-Cirrhotic	Mono-infected
699	576718	Female	3	non-PWID	SVR	SVR	Non-Cirrhotic	Mono-infected
700	2195527	Male	3	PWID	SVR	SVR	Non-Cirrhotic	Mono-infected
701	14330430	Male	3	non-PWID	SVR	SVR	Non-Cirrhotic	Mono-infected
702	7034046	Female	3	non-PWID	SVR	SVR	Non-Cirrhotic	Mono-infected
703	25450	Female	3	PWID	SVR	SVR	Non-Cirrhotic	Mono-infected
704	43693	Female	3	PWID	SVR	SVR	Non-Cirrhotic	Mono-infected
705	1113501	Male	1	non-PWID	SVR	SVR	Non-Cirrhotic	Mono-infected
706	778433	Female	1	non-PWID	SVR	SVR	Non-Cirrhotic	Mono-infected
707	3461999	Male	3	PWID	Relapser	non-SVR	Cirrhotic	Mono-infected
708	1972470	Male	1	PWID	Non-Responder	non-SVR	Cirrhotic	Mono-infected
709	4178586	Male	3	PWID	Relapser	non-SVR	Non-Cirrhotic	Mono-infected
710	75703	Female	3	PWID	SVR	SVR	Non-Cirrhotic	Mono-infected
711	110447	Male	3	non-PWID	SVR	SVR	Non-Cirrhotic	Mono-infected
712	2786437	Male	3	non-PWID	SVR	SVR	Non-Cirrhotic	Mono-infected
713	7932728	Male	3	PWID	SVR	SVR	Non-Cirrhotic	Mono-infected
714	194824	Male	1	non-PWID	SVR	SVR	Cirrhotic	Mono-infected
715	9600224	Male	3	non-PWID	SVR	SVR	Cirrhotic	Mono-infected
716	1005688	Female	3	non-PWID	SVR	SVR	Non-Cirrhotic	Mono-infected
717		Male	3	PWID	SVR	SVR	Non-Cirrhotic	Mono-infected
718	1944574	Male	3	PWID	SVR	SVR	Non-Cirrhotic	Mono-infected
719	4272614	Male	1	non-PWID	Non-Responder	non-SVR	Non-Cirrhotic	Mono-infected
720	127291	Male	2	non-PWID	Relapser	non-SVR	Non-Cirrhotic	Mono-infected
721	2127454	Male	1	PWID	SVR	SVR	Non-Cirrhotic	Mono-infected
722	473964	Male	3	PWID	SVR	SVR	Cirrhotic	Mono-infected
723	224739	Male	3	non-PWID	SVR	SVR	Non-Cirrhotic	Mono-infected
724	640664	Female	3	non-PWID	SVR	SVR	Non-Cirrhotic	Mono-infected
725	50422	Female	3	PWID	SVR	SVR	Non-Cirrhotic	Mono-infected
726	714904	Male	3	non-PWID	SVR	SVR	Non-Cirrhotic	Mono-infected
727	349532	Male	3	non-PWID	Relapser	non-SVR	Non-Cirrhotic	Mono-infected
728		Male	1	PWID	SVR	SVR	Non-Cirrhotic	Mono-infected
729		Male	1	PWID	SVR	SVR	Non-Cirrhotic	Mono-infected
730		Male	1	PWID	Relapser	non-SVR	Non-Cirrhotic	Mono-infected
731		Male	1	PWID	Non-Responder	non-SVR	Non-Cirrhotic	Mono-infected
732		Female	1	PWID	SVR	SVR	Non-Cirrhotic	Mono-infected
733		Male	1	PWID	SVR	SVR	Non-Cirrhotic	Mono-infected
734		Male	1	PWID	SVR	SVR	Non-Cirrhotic	Mono-infected
735		Female	3	PWID	SVR	SVR	Non-Cirrhotic	Mono-infected
736		Male	1	PWID	SVR	SVR	Non-Cirrhotic	Mono-infected
737		Female	1	PWID	Relapser	non-SVR	Non-Cirrhotic	Mono-infected
738		Male	1	PWID	Non-Responder	non-SVR	Non-Cirrhotic	Mono-infected
739		Male	1	PWID	Supsended	non-SVR	Non-Cirrhotic	Mono-infected
740		Male	1	PWID	Relapser	non-SVR	Non-Cirrhotic	Mono-infected
741		Male	3	PWID	SVR	SVR	Non-Cirrhotic	Mono-infected
742		Female	1	PWID	Supsended	non-SVR	Non-Cirrhotic	Mono-infected
743		Male	3	PWID	SVR	SVR	Non-Cirrhotic	Mono-infected
744		Male	3	PWID	Relapser	non-SVR	Non-Cirrhotic	Mono-infected
745		Male	3	PWID	SVR	SVR	Non-Cirrhotic	Mono-infected
746		Male	3	PWID	SVR	SVR	Non-Cirrhotic	Mono-infected
747		Male	3	PWID	Relapser	non-SVR	Non-Cirrhotic	Mono-infected
748		Male	3	PWID	Supsended	non-SVR	Non-Cirrhotic	Mono-infected
749		Male	3	PWID	SVR	SVR	Non-Cirrhotic	Mono-infected
750		Female	3	PWID	SVR	SVR	Non-Cirrhotic	Mono-infected
751		Male	1	PWID		non-SVR	Non-Cirrhotic	Mono-infected
752		Female	3	PWID	SVR	SVR	Non-Cirrhotic	Mono-infected
753		Male	3	PWID	Relapser	non-SVR	Non-Cirrhotic	Mono-infected
754		Female	2	PWID	SVR	SVR	Non-Cirrhotic	Mono-infected
755		Male	3	PWID	SVR	SVR	Non-Cirrhotic	Mono-infected
756		Male	3	PWID	Supsended	SVR	Non-Cirrhotic	Mono-infected
757		Male	3	PWID	SVR	SVR	Non-Cirrhotic	Mono-infected
758		Male	3	PWID	SVR	SVR	Non-Cirrhotic	Mono-infected
759		Male	1	PWID	SVR	SVR	Non-Cirrhotic	Mono-infected
760		Male	3	PWID	SVR	SVR	Non-Cirrhotic	Mono-infected
761		Female	3	PWID	SVR	SVR	Non-Cirrhotic	Mono-infected
762		Male	3	PWID	SVR	SVR	Non-Cirrhotic	Mono-infected
763		Male	1	PWID	SVR	SVR	Non-Cirrhotic	Mono-infected
764		Male	1	PWID	SVR	SVR	Non-Cirrhotic	Mono-infected
765		Male	1	PWID	SVR	SVR	Non-Cirrhotic	Mono-infected
766		Male	3	PWID	SVR	SVR	Non-Cirrhotic	Mono-infected
767		Male	1	PWID	Non-Responder	non-SVR	Non-Cirrhotic	Mono-infected
768		Male	1	PWID		non-SVR	Non-Cirrhotic	Mono-infected
769		Female	1	PWID	SVR	SVR	Non-Cirrhotic	Mono-infected
770		Male	1	PWID	Supsended	non-SVR	Non-Cirrhotic	Mono-infected
771		Female	2	PWID	SVR	SVR	Non-Cirrhotic	Mono-infected
772		Male	1	PWID	SVR	SVR	Non-Cirrhotic	Mono-infected
773		Male	3	PWID	SVR	SVR	Non-Cirrhotic	Mono-infected
774		Male	1	PWID	SVR	SVR	Non-Cirrhotic	Mono-infected
775		Male	1	PWID	SVR	SVR	Non-Cirrhotic	Mono-infected
776		Male	3	PWID	SVR	SVR	Non-Cirrhotic	Mono-infected
777		Male	1	PWID	SVR	SVR	Non-Cirrhotic	Mono-infected
778		Male	2	PWID	SVR	SVR	Non-Cirrhotic	Mono-infected
779		Male	1	PWID	Non-Responder	non-SVR	Non-Cirrhotic	Mono-infected
780		Male	1	PWID	SVR	SVR	Non-Cirrhotic	Mono-infected
781		Male	1	PWID	LTF	non-SVR	Non-Cirrhotic	Mono-infected
782		Male	3	PWID	SVR	SVR	Non-Cirrhotic	Mono-infected
783		Male	3	PWID		non-SVR	Non-Cirrhotic	Mono-infected
784		Male	2	PWID	SVR	SVR	Non-Cirrhotic	Mono-infected
785		Female	3	PWID	SVR	SVR	Non-Cirrhotic	Mono-infected
786		Male	3	PWID	SVR	SVR	Non-Cirrhotic	Mono-infected
787		Female	3	PWID	SVR	SVR	Non-Cirrhotic	Mono-infected
788		Male	1	PWID	Non-Responder	non-SVR	Non-Cirrhotic	Mono-infected
789		Male	3	PWID	SVR	SVR	Non-Cirrhotic	Mono-infected
790		Male	1	PWID	Non-Responder	non-SVR	Non-Cirrhotic	Mono-infected
791		Male	3	PWID	SVR	SVR	Non-Cirrhotic	Mono-infected
792		Male	1	PWID	Non-Responder	non-SVR	Non-Cirrhotic	Mono-infected
793		Male	1	PWID	SVR	SVR	Non-Cirrhotic	Mono-infected
794		Male	1	PWID	SVR	SVR	Non-Cirrhotic	Mono-infected
795		Male	1	PWID	Relapser	non-SVR	Non-Cirrhotic	Mono-infected
796		Male	1	PWID	Non-Responder	non-SVR	Non-Cirrhotic	Mono-infected
797		Male	3	PWID	SVR	SVR	Non-Cirrhotic	Mono-infected
798		Male	1	PWID	SVR	SVR	Non-Cirrhotic	Mono-infected
799		Female	1	PWID	SVR	SVR	Non-Cirrhotic	Mono-infected
800		Male	3	PWID	Relapser	non-SVR	Non-Cirrhotic	Mono-infected
801		Female	3	PWID	SVR	SVR	Non-Cirrhotic	Mono-infected
802		Female	1	PWID	SVR	SVR	Non-Cirrhotic	Mono-infected
803		Female	1	PWID	SVR	SVR	Non-Cirrhotic	Mono-infected
804		Male	3	PWID	SVR	SVR	Non-Cirrhotic	Mono-infected
805		Male	3	PWID	SVR	SVR	Non-Cirrhotic	Mono-infected
806		Male	3	PWID	SVR	SVR	Non-Cirrhotic	Mono-infected
807		Male	2	PWID	SVR	SVR	Non-Cirrhotic	Mono-infected
808		Male	1	PWID	SVR	SVR	Non-Cirrhotic	Mono-infected
809		Female	3	PWID	SVR	SVR	Non-Cirrhotic	Mono-infected
810		Male	3	PWID	SVR	SVR	Non-Cirrhotic	Mono-infected
811		Male	3	PWID	SVR	SVR	Non-Cirrhotic	Mono-infected
812		Female	1	PWID	Relapser	non-SVR	Non-Cirrhotic	Mono-infected
813	2487885	Male	3	PWID	Non-Responder	non-SVR	Cirrhotic	Co-infected
814	127916	Female	3	PWID	SVR	SVR	Non-Cirrhotic	Co-infected
815	2494423	Male	1	PWID	Non-Responder	non-SVR	Cirrhotic	Co-infected
816	48651	Male	3	PWID	Supsended	non-SVR	Non-Cirrhotic	Co-infected
817	5817596	Male	3	PWID	SVR	SVR	Non-Cirrhotic	Co-infected
818	360962	Male	3	PWID	SVR	SVR	Non-Cirrhotic	Co-infected
819	48063	Male	3	PWID	Non-Responder	non-SVR	Non-Cirrhotic	Co-infected
820	81567	Male	3	PWID	SVR	SVR	Cirrhotic	Co-infected
821	671178	Male	1	PWID	Non-Responder	non-SVR	Cirrhotic	Co-infected
822	2679231	Male	1	PWID	Non-Responder	non-SVR	Non-Cirrhotic	Co-infected
823	10132692	Female	3	non-PWID	Non-Responder	non-SVR	Non-Cirrhotic	Co-infected
824	957115	Female	1	non-PWID	Non-Responder	non-SVR	Non-Cirrhotic	Co-infected
825	1219615	Female	1	PWID	Non-Responder	non-SVR	Cirrhotic	Co-infected
826	2531603	Male	2	PWID	Non-Responder	non-SVR	Non-Cirrhotic	Co-infected
827	10000000	Female	1	non-PWID	Non-Responder	non-SVR	Non-Cirrhotic	Co-infected
828	560715	Male	3	PWID	SVR	SVR	Non-Cirrhotic	Co-infected
829	2984615	Male	3	PWID	SVR	SVR	Non-Cirrhotic	Co-infected
830	197987	Male	4	non-PWID	SVR	SVR	Non-Cirrhotic	Co-infected
831	4557056	Male	1	PWID	Non-Responder	non-SVR	Non-Cirrhotic	Co-infected
832	797094	Male	3	PWID	SVR	SVR	Cirrhotic	Co-infected
833	1168371	Male	3	PWID	Supsended	non-SVR	Non-Cirrhotic	Co-infected
834	1877586	Male	3	PWID	SVR	SVR	Non-Cirrhotic	Co-infected
835	6854935	Male	1	PWID	Non-Responder	non-SVR	Non-Cirrhotic	Co-infected
836	633932	Male	3	PWID	SVR	SVR	Non-Cirrhotic	Mono-infected
837	938314	Male	3	PWID	SVR	SVR	Cirrhotic	Co-infected
838	1470994	Male	3	non-PWID	SVR	SVR	Non-Cirrhotic	Co-infected
839	661956	Male	3	non-PWID	SVR	SVR	Non-Cirrhotic	Co-infected
840	4915745	Male	3	non-PWID	SVR	SVR	Non-Cirrhotic	Co-infected
841	339250	Female	3	non-PWID	SVR	SVR	Non-Cirrhotic	Co-infected
842	555555	Male	3	PWID	SVR	SVR	Non-Cirrhotic	Co-infected
843	363248	Female	1	PWID	SVR	SVR	Non-Cirrhotic	Co-infected
844	2076142	Male	2	non-PWID	SVR	SVR	Non-Cirrhotic	Co-infected
845	1324786	Male	2	non-PWID	SVR	SVR	Non-Cirrhotic	Co-infected
846	6333772	Male	1	non-PWID	SVR	SVR	Non-Cirrhotic	Co-infected
847	1102550	Male	1	non-PWID	Relapser	non-SVR	Non-Cirrhotic	Mono-infected
848	830279	Male	2	non-PWID	SVR	SVR	Non-Cirrhotic	Co-infected
849		Male	3	PWID	Supsended	non-SVR	Non-Cirrhotic	Mono-infected
850	19197	Female	3	PWID	SVR	SVR	Non-Cirrhotic	Mono-infected
851		Male	3	non-PWID	SVR	SVR	Cirrhotic	Mono-infected
852	1134615	Male	3	non-PWID	Relapser	non-SVR	Cirrhotic	Co-infected
853	501378	Male	3	PWID	SVR	SVR	Non-Cirrhotic	Co-infected
854	2658239	Male	1	PWID	Relapser	non-SVR	Cirrhotic	Mono-infected
855	2230769	Male	1	non-PWID	Non-Responder	non-SVR	Cirrhotic	Co-infected
856	1074442	Male	3	PWID	SVR	SVR	Non-Cirrhotic	Mono-infected
857		Male	3	PWID	SVR	SVR	Non-Cirrhotic	Mono-infected
858	11741	Male	1	non-PWID	SVR	SVR	Non-Cirrhotic	Co-infected
859	771683	Female	1	PWID	SVR	SVR	Non-Cirrhotic	Co-infected
860	2122662	Male	1	non-PWID	Relapser	non-SVR	Cirrhotic	Co-infected
861		Male	3	non-PWID	SVR	SVR	Non-Cirrhotic	Mono-infected
862	97003	Male	3	PWID	SVR	SVR	Non-Cirrhotic	Mono-infected
863	266824	Male	3	PWID	SVR	SVR	Non-Cirrhotic	Co-infected
864	3742825	Male	3	PWID	Relapser	non-SVR	Non-Cirrhotic	Co-infected
865	423769	Male	1	PWID	SVR	SVR	Non-Cirrhotic	Co-infected
866	238076	Male	2	non-PWID	SVR	SVR	Non-Cirrhotic	Co-infected
867	3501842	Male	1	non-PWID	Non-Responder	non-SVR	Cirrhotic	Co-infected
868	21095	Male	3	PWID	SVR	SVR	Non-Cirrhotic	Co-infected
869	4454962	Male	1	non-PWID	Non-Responder	non-SVR	Cirrhotic	Co-infected
870		Male	4	PWID	SVR	SVR	Non-Cirrhotic	Co-infected
871	1310772	Male	3	PWID	SVR	SVR	Non-Cirrhotic	Co-infected
872	1802320	Female	3	non-PWID	Relapser	non-SVR	Cirrhotic	Co-infected
873	7692308	Male	1	PWID	Non-Responder	non-SVR	Non-Cirrhotic	Co-infected
874	1265612	Female	3	PWID	Supsended	non-SVR	Non-Cirrhotic	Mono-infected
875	48213	Male	3	PWID	SVR	SVR	Non-Cirrhotic	Co-infected
876	154728	Male	3	PWID	Non-Responder	non-SVR	Cirrhotic	Co-infected
877	201636	Male	2	non-PWID	SVR	SVR	Non-Cirrhotic	Co-infected
878	2946812	Male	3	PWID	SVR	SVR	Non-Cirrhotic	Co-infected
879	395542	Male	1	PWID	SVR	SVR	Non-Cirrhotic	Co-infected
880	1606204	Male	3	PWID	SVR	SVR	Non-Cirrhotic	Co-infected
881	2173077	Male	1	PWID	Non-Responder	non-SVR	Cirrhotic	Co-infected
882		Male	1	non-PWID	Relapser	non-SVR	Cirrhotic	Co-infected
883	401363	Male	3	PWID	SVR	SVR	Non-Cirrhotic	Co-infected
884	1002122	Male	1	PWID	SVR	SVR	Non-Cirrhotic	Co-infected
885	2049133	Male	3	PWID	Supsended	non-SVR	Non-Cirrhotic	Mono-infected
886	1748381	Male	1	PWID	Non-Responder	non-SVR	Non-Cirrhotic	Co-infected
887	820336	Male	1	PWID	SVR	SVR	Non-Cirrhotic	Co-infected
888	431382	Male	1	non-PWID	SVR	SVR	Non-Cirrhotic	Co-infected
889	3525632	Male	1	non-PWID	Relapser	non-SVR	Non-Cirrhotic	Co-infected
890	699373	Male	3	PWID	Supsended	non-SVR	Non-Cirrhotic	Co-infected
891	255807	Female	3	non-PWID	SVR	SVR	Non-Cirrhotic	Mono-infected
892	1137915	Male	1	PWID	SVR	SVR	Cirrhotic	Co-infected
893	893994	Male	3	PWID	SVR	SVR	Non-Cirrhotic	Co-infected
894	615	Male	3	PWID	SVR	SVR	Non-Cirrhotic	Co-infected
895	654641	Male	2	PWID	SVR	SVR	Non-Cirrhotic	Co-infected
896	4676255	Male	1	PWID	Non-Responder	non-SVR	Non-Cirrhotic	Co-infected
897		Male	1	PWID	Supsended	non-SVR	Non-Cirrhotic	Mono-infected
898	3278064	Male	1	non-PWID	Non-Responder	non-SVR	Cirrhotic	Co-infected
899	1837614	Male	3	PWID	SVR	SVR	Non-Cirrhotic	Co-infected
900	2692308	Male	1	PWID	Non-Responder	non-SVR	Non-Cirrhotic	Co-infected
901	1349679	Female	1	non-PWID	Non-Responder	non-SVR	Non-Cirrhotic	Co-infected
902	137375	Male	1	PWID	Non-Responder	non-SVR	Cirrhotic	Co-infected
903	1780618	Male	1	PWID	SVR	SVR	Non-Cirrhotic	Co-infected
904		Male	1	PWID	Relapser	non-SVR	Non-Cirrhotic	Co-infected
905		Female	1	PWID	Supsended	non-SVR	Non-Cirrhotic	Co-infected
906		Female	3	PWID	SVR	SVR	Non-Cirrhotic	Co-infected
907	1504242	Female	1	non-PWID	Non-Responder	non-SVR	Non-Cirrhotic	Co-infected
908		Male	1	PWID	Supsended	non-SVR	Non-Cirrhotic	Co-infected
909	79996	Male	3	PWID	SVR	SVR	Non-Cirrhotic	Co-infected
910	671690	Male	4	PWID	Relapser	non-SVR	Non-Cirrhotic	Co-infected
911	5258195	Female	1	PWID	Relapser	non-SVR	Non-Cirrhotic	Co-infected
912	915948	Male	3	non-PWID	SVR	SVR	Non-Cirrhotic	Co-infected
913	66690	Male	3	non-PWID	SVR	SVR	Non-Cirrhotic	Co-infected
914	796564	Male	3	PWID	SVR	SVR	Non-Cirrhotic	Co-infected
915	670173	Male	3	PWID	SVR	SVR	Non-Cirrhotic	Mono-infected
916	728549	Male	3	PWID	SVR	SVR	Non-Cirrhotic	Co-infected
917	308073	Female	1	non-PWID	Supsended	non-SVR	Non-Cirrhotic	Co-infected
918	283808	Male	1	PWID	SVR	SVR	Non-Cirrhotic	Co-infected
919		Male	1	PWID	SVR	SVR	Cirrhotic	Co-infected
920	18904	Female	3	PWID	SVR	SVR	Non-Cirrhotic	Mono-infected
921	194003	Female	1	PWID	Supsended	non-SVR	Cirrhotic	Co-infected
922		Male	1	PWID	Relapser	non-SVR	Non-Cirrhotic	Mono-infected
923	1742573	Male	3	PWID	SVR	SVR	Non-Cirrhotic	Co-infected
924	1198676	Male	1	PWID	Non-Responder	non-SVR	Non-Cirrhotic	Co-infected
925	129669	Male	3	PWID	Non-Responder	non-SVR	Cirrhotic	Co-infected
926		Male	1	PWID	Non-Responder	non-SVR	Cirrhotic	Co-infected
927		Female	1	PWID	SVR	SVR	Non-Cirrhotic	Co-infected
928	1832161	Male	1	PWID	Relapser	non-SVR	Non-Cirrhotic	Co-infected
929		Male	3	non-PWID	SVR	SVR	Non-Cirrhotic	Co-infected
930		Female	3	PWID	SVR	SVR	Non-Cirrhotic	Co-infected
931	30060	Female	3	PWID	Relapser	non-SVR	Non-Cirrhotic	Co-infected
932	30266	Female	3	non-PWID	Supsended	non-SVR	Non-Cirrhotic	Mono-infected
933	6814536	Male	3	PWID	SVR	SVR	Non-Cirrhotic	Co-infected
934	9715	Female	3	PWID	SVR	SVR	Non-Cirrhotic	Co-infected
935	2974750	Female	1	non-PWID	SVR	SVR	Non-Cirrhotic	Co-infected
936	4565369	Male	1	PWID	SVR	SVR	Non-Cirrhotic	Co-infected
937	3589308	Male	1	non-PWID	Supsended	non-SVR	Cirrhotic	Co-infected
938	30258244	Male	1	PWID	Supsended	non-SVR	Non-Cirrhotic	Co-infected
939	7558915	Male	2	PWID	SVR	SVR	Non-Cirrhotic	Co-infected
940	443480	Female	3	non-PWID	SVR	SVR	Non-Cirrhotic	Co-infected
941	2941753	Male	3	PWID	SVR	SVR	Non-Cirrhotic	Co-infected
942	7691335	Male	3	PWID	Supsended	non-SVR	Non-Cirrhotic	Co-infected
943	19470394	Male	3	non-PWID	Non-Responder	non-SVR	Non-Cirrhotic	Co-infected
944	3213864	Female	1	PWID	Relapser	non-SVR	Non-Cirrhotic	Co-infected
945		Male	3	PWID	Supsended	non-SVR	Non-Cirrhotic	Co-infected
946	3782022	Male	1	PWID	SVR	SVR	Non-Cirrhotic	Co-infected
947	7132246	Female	1	PWID	SVR	SVR	Non-Cirrhotic	Co-infected
948	53101	Female	1	PWID	SVR	SVR	Non-Cirrhotic	Co-infected
949	2219832	Male	3	PWID	Supsended	non-SVR	Cirrhotic	Co-infected
950	1466257	Male	3	PWID	SVR	SVR	Non-Cirrhotic	Co-infected
951	6314048	Female	1	PWID	Supsended	non-SVR	Non-Cirrhotic	Co-infected
952	14986516	Male	3	PWID	Relapser	non-SVR	Non-Cirrhotic	Co-infected
953	3685950	Male	1	PWID	SVR	SVR	Non-Cirrhotic	Co-infected
954	4831248	Male	3	PWID	Relapser	non-SVR	Non-Cirrhotic	Co-infected
955	777385	Male	3	PWID	SVR	SVR	Non-Cirrhotic	Co-infected
956	7070838	Male	2	PWID	SVR	SVR	Non-Cirrhotic	Co-infected
957	126	Female	4	PWID	SVR	SVR	Non-Cirrhotic	Co-infected
958	469238	Male	3	non-PWID	SVR	SVR	Non-Cirrhotic	Co-infected
959	16818374	Male	3	PWID	SVR	SVR	Non-Cirrhotic	Co-infected
960	402675	Male	3	PWID	SVR	SVR	Non-Cirrhotic	Co-infected
961	51840	Male	3	non-PWID	Relapser	non-SVR	Cirrhotic	Co-infected
962	4617968	Male	3	PWID	SVR	SVR	Non-Cirrhotic	Co-infected
963	3960288	Male	1	PWID	SVR	SVR	Non-Cirrhotic	Co-infected
964	53330	Male	3	PWID	SVR	SVR	Non-Cirrhotic	Co-infected
965	36007243	Male	1	PWID	Non-Responder	non-SVR	Non-Cirrhotic	Co-infected
966	24680300	Male	3	non-PWID	SVR	SVR	Non-Cirrhotic	Co-infected
967	10153500	Male	1	PWID	Relapser	non-SVR	Non-Cirrhotic	Co-infected
968	11735485	Male	3	non-PWID	Non-Responder	non-SVR	Cirrhotic	Co-infected
969	238570	Male	1	PWID	SVR	SVR	Cirrhotic	Co-infected
970	10880255	Male	3	PWID	SVR	SVR	Non-Cirrhotic	Co-infected
971	1063750	Female	1	non-PWID	SVR	SVR	Non-Cirrhotic	Mono-infected
972	27026821	Male	1	PWID	Non-Responder	non-SVR	Non-Cirrhotic	Co-infected
973	3417509	Male	1	PWID	SVR	SVR	Non-Cirrhotic	Co-infected
974	69000000	Female	1	PWID	SVR	SVR	Non-Cirrhotic	Co-infected
975	16212749	Male	1	PWID	SVR	SVR	Non-Cirrhotic	Co-infected
976	10281874	Male	2	PWID	SVR	SVR	Non-Cirrhotic	Co-infected
977	2990696	Male	1	PWID	SVR	SVR	Non-Cirrhotic	Mono-infected
978		Male	3	PWID	SVR	SVR	Non-Cirrhotic	Mono-infected
979	4164094	Male	1	PWID	SVR	SVR	Non-Cirrhotic	Co-infected
980		Male	3	PWID	SVR	SVR	Non-Cirrhotic	Mono-infected
981		Female	3	non-PWID	Relapser	non-SVR	Non-Cirrhotic	Co-infected
982	3560796	Male	3	PWID	SVR	SVR	Non-Cirrhotic	Co-infected
983	40007	Male	3	PWID	SVR	SVR	Non-Cirrhotic	Co-infected
984	2191105	Female	1	PWID	Supsended	non-SVR	Non-Cirrhotic	Co-infected
985	181448	Female	3	non-PWID	SVR	SVR	Non-Cirrhotic	Mono-infected
986	301752	Female	3	PWID	SVR	SVR	Non-Cirrhotic	Co-infected
987	218189	Male	3	non-PWID	SVR	SVR	Cirrhotic	Co-infected
988	2786605	Female	3	PWID	SVR	SVR	Non-Cirrhotic	Co-infected
989	238076	Male	3	non-PWID	SVR	SVR	Non-Cirrhotic	Mono-infected
990		Female	3	non-PWID	Non-Responder	non-SVR	Cirrhotic	Co-infected
991	5863010	Male	3	non-PWID	SVR	SVR	Non-Cirrhotic	Mono-infected
992		Male	3	PWID	Non-Responder	non-SVR	Non-Cirrhotic	Co-infected
993	2870227	Male	3	PWID	SVR	SVR	Non-Cirrhotic	Mono-infected
994		Male	3	non-PWID	LTF	non-SVR	Non-Cirrhotic	Mono-infected
995		Female	3	non-PWID	SVR	SVR	Cirrhotic	Co-infected
996	384105	Male	3	PWID	SVR	SVR	Non-Cirrhotic	Mono-infected
997	4000306	Female	3	PWID	SVR	SVR	Non-Cirrhotic	Mono-infected
998	57036	Male	1	PWID	LTF	non-SVR	Cirrhotic	Co-infected
999	3753999	Male	3	PWID	SVR	SVR	Non-Cirrhotic	Mono-infected
1000	2046817	Male	3	PWID	SVR	SVR	Non-Cirrhotic	Mono-infected
